# Supplementary material for: Multimorbidity and health-related quality of life among patients attending chronic outpatient medical care in Bahir Dar, Northwest Ethiopia: The application of partial proportional odds model
Source: PLOS Glob Public Health. 2022 Nov 2;2(11):e0001176. doi: 10.1371/journal.pgph.0001176 (PMC10021695; doi:10.1371/journal.pgph.0001176)
Supplement: S1 Output — (DO) [file pgph.0001176.s002.do]

use "C:\From desktop\Files spss\Analysis_Sep-23.dta"
tab QoL
save "C:\From desktop\Files spss\New manuscripts\plos global public health data redoing.dta"
svydescribe
svyset
tab FACICAT
svyset FACICAT [pweight= MULTIMORBIDTYTWOCAT], strata(Sex)
svyset MULTIMORBIDTYTWOCAT [pweight= AGE], strata(FACICAT )
svyset MULTIMORBALLDIS [pweight= AGE], strata(FACICAT )
svyset MULTIMORBALLDIS [pweight= AGE], strata(FACICAT)
svyset MULTIMORBALLDIS [pweight= QoL], strata(FACICAT)
svyset MULTIMORBALLDIS [pweight= QoL], strata(FACICAT)
svyset FACICAT [pweight= QoL], strata(Sex)
svyset FACICAT [pweight= QoL], strata(Sex)
sum QoL Sex Facility_ID
sum FACICAT QoL Sex
tab QOLHL
sum FACICAT PAMCATSCALED Sex
reg QoL MULTIMORBIDTYTWOCAT Sex AGE
logistic QoL MULTIMORBIDTYTWOCAT
ologit QoL MULTIMORBIDTYTWOCAT
svy: ologit QoL MULTIMORBIDTYTWOCAT
ologit QoL MULTIMORBALLDIS
svy:ologit QoL MULTIMORBALLDIS
ologit QoL Sex
svy:ologit QoL Sex
ologit QoL i.Sex
svy:ologit QoL i.Sex
ologit QoL AGE1
svy:ologit QoL AGE
ologit QoL BMI1
svy:ologit QoL BMI1
ologit QoL SOCIALSUPPCAT3
svy:ologit QoL SOCIALSUPPCAT3
ologit QoL Wealthinto3
svy:ologit QoL Wealthinto3
ologit QoL Socialsupp2
ologit QoL Satisfac2
svy: ologit QoL Satisfac2
tab FUN2
tab BMI22
ologit QoL FUN2
svy: ologit QoL FUN2
svy: ologit QoL SES2
svy: ologit QoL SES2
svy: ologit QoL BMI22
svy: ologit QoL PAM22
svy: ologit QoL Class
ologit QoL Class
tab Class
ologit QoL i. Class
ologit QoL ib(3). Class
svy: ologit QoL FUN2
tab PAM22
svy: ologit QoL TotalPAMscore
svy: ologit QoL Score
svy: ologit QoL Score, or
gologit2 QoL MULTIMORBIDTYTWOCAT Sex AGE OSLOSS Satisfac2 FUN2 BMI22 SES2, log
gsvy:gologit2 QoL MULTIMORBIDTYTWOCAT Sex AGE OSLOSS Satisfac2 FUN2 BMI22 SES2
gsvy:gologit2 QoL MULTIMORBIDTYTWOCAT
gsvy:gologit2 QoL MULTIMORBIDTYTWOCAT Sex
gsvy:gologit2 QoL MULTIMORBIDTYTWOCAT Sex AGE
gsvy:gologit2 QoL MULTIMORBIDTYTWOCAT Sex AGE OSLOSS
gsvy:gologit2 QoL MULTIMORBIDTYTWOCAT Sex AGE  Satisfac2
gsvy:gologit2 QoL MULTIMORBIDTYTWOCAT Sex AGE  Satisfac2 FUN2
gsvy:gologit2 QoL MULTIMORBIDTYTWOCAT Sex AGE  Satisfac2 FUN2 BMI22
gsvy:gologit2 QoL MULTIMORBIDTYTWOCAT Sex AGE  Satisfac2 FUN2 BMI22 SES2
gsvy:gologit2 QoL MULTIMORBIDTYTWOCAT Sex AGE  Satisfac2 FUN2 BMI22 SES2 OSLOSS
gsvy:gologit2 QoL MULTIMORBIDTYTWOCAT Sex AGE  Satisfac2 FUN2 BMI22 SES2 Socialsupp2
ologit QoL Socialsupp2
tab Socialsupp2
ologit QoL TotalPAMscore
brant
gsvy:gologit2 QoL MULTIMORBIDTYTWOCAT Sex AGE  Satisfac2 FUN2 BMI22 SES2 Socialsupp2 TotalPAMscore
gsvy:gologit2 QoL MULTIMORBIDTYTWOCAT Sex AGE  Satisfac2 FUN2 BMI22 SES2 Socialsupp2
gologit2 QoL MULTIMORBIDTYTWOCAT Sex AGE OSLOSS Satisfac2 FUN2 BMI22 SES2, auto lrforce
gologit2 QoL MULTIMORBIDTYTWOCAT Sex AGE Satisfac2 FUN2 BMI22 SES2, auto lrforce
gsvy:gologit2 QoL MULTIMORBIDTYTWOCAT Sex AGE Satisfac2 FUN2 BMI22 SES2, auto lrforce
brant
gologit2 QoL MULTIMORBIDTYTWOCAT Sex AGE Satisfac2 FUN2 BMI22 SES2, auto lrforce
brant
ologit2 QoL MULTIMORBIDTYTWOCAT Sex AGE Satisfac2 FUN2 BMI22 SES2, auto lrforce
ologit QoL MULTIMORBIDTYTWOCAT Sex AGE Satisfac2 FUN2 BMI22 SES2, auto lrforce
ologit QoL MULTIMORBIDTYTWOCAT Sex AGE Satisfac2 FUN2 BMI22 SES2, lrforce
ologit QoL MULTIMORBIDTYTWOCAT Sex AGE Satisfac2 FUN2 BMI22 SES2
brant
gsvy:gologit2 QoL MULTIMORBIDTYTWOCAT Sex AGE Satisfac2 FUN2 BMI22 SES2, auto lrforce
gsvy:gologit2 QoL MULTIMORBIDTYTWOCAT Sex AGE Satisfac2 FUN2 BMI22 SES2, auto lrforce
ologit QoL MULTIMORBIDTYTWOCAT Sex AGE Satisfac2 FUN2 BMI22 SES2
brant
gsvy:gologit2 QoL MULTIMORBIDTYTWOCAT Sex AGE Satisfac2 FUN2 BMI22 SES2
gsvy:gologit2 QoL MULTIMORBIDTYTWOCAT Sex AGE Satisfac2 FUN2 BMI22 SES2, auto
gsvy:gologit2 QoL MULTIMORBIDTYTWOCAT Sex AGE Satisfac2 FUN2 BMI22 SES2
svy:ologit QoL MULTIMORBIDTYTWOCAT Sex AGE Satisfac2 FUN2 BMI22 SES2
gsvy:gologit2 QoL MULTIMORBIDTYTWOCAT Sex AGE Satisfac2 FUN2 BMI22 SES2
gsvy:gologit2 QoL MULTIMORBIDTYTWOCAT Sex AGE Satisfac2 FUN2 BMI22 SES2, auto
gsvy:gologit2 QoL MULTIMORBIDTYTWOCAT Sex AGE Satisfac2 FUN2 BMI22 SES2 PAMScaled , auto
gsvy:gologit2 QoL MULTIMORBIDTYTWOCAT Sex AGE Satisfac2 FUN2 BMI22 SES2 PAMScaled OSLOSS , auto
gsvy:gologit2 QoL MULTIMORBIDTYTWOCAT Sex AGE Satisfac2 FUN2 BMI22 SES2 PAMScaled , auto
gsvy:gologit2 QoL MULTIMORBIDTYTWOCAT Sex AGE Satisfac2 FUN2 BMI22 SES2 PAMScaled , auto (0.01)
gsvy:gologit2 QoL MULTIMORBIDTYTWOCAT Sex AGE Satisfac2 FUN2 BMI22 SES2 PAMScaled , auto (0.001)
gsvy:gologit2 QoL MULTIMORBIDTYTWOCAT Sex AGE Satisfac2 FUN2 BMI22 SES2 PAMScaled , auto (0.05)
gsvy:gologit2 QoL MULTIMORBIDTYTWOCAT Sex AGE Satisfac2 FUN2 BMI22 SES2 , auto (0.05)
gsvy:gologit2 QoL MULTIMORBIDTYTWOCAT Sex AGE Satisfac2 FUN2 BMI22 SES2, auto lrforce
gsvy:gologit2 QoL MULTIMORBIDTYTWOCAT Sex AGE Satisfac2 FUN2 BMI22 SES2, or
gsvy:gologit2 QoL MULTIMORBIDTYTWOCAT Sex AGE Satisfac2 FUN2 BMI22 SES2, auto lrforce or
